# Supplementary material for: PPARγ lipodystrophy mutants reveal intermolecular interactions required for enhancer activation
Source: PubMed Central journal article supplement (PMC9675755; doi:10.1038/s41467-022-34766-9), 2022-11-19
Supplement: 41467_2022_34766_MOESM1_ESM.pdf [file 41467_2022_34766_MOESM1_ESM.pdf]

**PPAR $\gamma$  lipodystrophy mutants reveal intermolecular interactions required  
for enhancer activation**

**Supplementary information**

Supplementary Table 1: Oligonucleotides

Supplementary Table 2: PPAR $\gamma$ 2-WT regulated genes

Supplementary Table 3: Genes contributing to PCA

Supplementary Table 4: Mutation sensitive genes

Supplementary Figures 1-10

## Supplementary Table 1 Oligonucleotides

| Oligonucleotides for reporter constructs        |                                                                                 |
|-------------------------------------------------|---------------------------------------------------------------------------------|
| LPL_upstream_fw                                 | GCGTGCTAGCCCGGGGAAGA <b>AGGGGAAAAGGGCA</b> CTCGAGATCTGCGAT                      |
| LPL_upstream_rev                                | ATCGCAGATCTCGAG <b>TGCCCTTTCCCT</b> TCTTCCCCGGGCTAGCACGC                        |
| LPL_downstream_fw                               | AATCGATAAGGATCCGAAGA <b>AGGGGAAAAGGGCA</b> GTCGACCGATGCCCT                      |
| LPL_downstream_rev                              | AGGGCATCGGTGCGACT <b>TGCCCTTTCCCT</b> TCTTCGGATCCTTATCGATT                      |
| CIDEC_upstream-fw                               | GCCCGGGGCACT <b>AGGCAAGAGGGCA</b> CTCGAGATCTGCG                                 |
| CIDEC_upstream_rev                              | CGCAGATCTCGAG <b>TGCCCTCTTGCC</b> TAGTGCCCCGGGC                                 |
| CIDEC_downstream_fw                             | AGGATCCGCACT <b>AGGCAAGAGGGCA</b> GTCGACCGATGCC                                 |
| CIDEC_downstream_rev                            | GGCATCGGTGCGACT <b>TGCCCTCTTGCC</b> TAGTGCGGATCCT                               |
| LPL_5'UR_upstream-fw                            | GCCCGGGGACGA <b>AGGGAAAAGGGCA</b> CTCGAGATCTGCG                                 |
| LPL_5'UR_upstream_rev                           | CGCAGATCTCGAG <b>TGCCCTTTCCCT</b> TCGTCCCCGGGC                                  |
| LPL_5'UR_downstream_fw                          | AGGATCCGACGA <b>AGGGAAAAGGGCA</b> GTCGACCGATGCC                                 |
| LPL_5'UR_downstream_rev                         | GGCATCGGTGCGACT <b>TGCCCTTTCCCT</b> TCGTTCGGATCCT                               |
| CIDEC 5' UR_upstream_fw                         | GCCCGGGGCCCCA <b>AGGCAAGAGGGCA</b> CTCGAGATCTGCG                                |
| CIDEC 5' UR_upstream_rev                        | CGCAGATCTCGAG <b>TGCCCTCTTGCC</b> TGGGCCCGGGC                                   |
| CIDEC_5' UR_downstream_fw                       | AGGATCCGCCCA <b>AGGCAAGAGGGCA</b> GTCGACCGATGCC                                 |
| CIDEC_5' UR_downstream_rev                      | GGCATCGGTGCGACT <b>TGCCCTCTTGCC</b> TGGGCGGATCCT                                |
| Synthetic PPRE_upstream_fw                      | GCGTGCTAGCCCGGGAACT <b>AGGTCAAAGGTCA</b> CTCGAGATCTGCGAT                        |
| Synthetic PPRE_upstream_rev                     | ATCGCAGATCTCGAG <b>TGACCTTTGACCT</b> AGTTCCCCGGGCTAGCACGC                       |
| Synthetic PPRE_downstream_fw                    | AATCGATAAGGATCCA <b>AGGTCAAAGGTCA</b> GTCGACCGATGCCCT                           |
| Synthetic PPRE_downstream_rev                   | AGGGCATCGGTGCGACT <b>TGACCTTTGACCT</b> AGTTGGATCCTTATCGATT                      |
| Oligonucleotides for DNA affinity purifications |                                                                                 |
| CIDEC_fw                                        | 5BiosgAGAAGAGG <b>TACTGCCCATGGCACTAGGCAAGAGGGCACAGAA</b><br>GCAATGGATGTGGCTTAT  |
| CIDEC_rev                                       | ATAAGCCACATCCATTGCTTCTG <b>TGCCCTCTTGCC</b> TAGTGCCATGGGC<br>AGTACCTCTTCT       |
| CIDEC_dead_fw                                   | 5BiosgAGAAGAGG <b>TACTGCCCATGGCACTAGCCAAGAGCACACAGAA</b><br>GCAATGGATGTGGCTTAT  |
| CIDEC_dead_rev                                  | ATAAGCCACATCCATTGCTTCTG <b>TGTGCTCTTGGCT</b> AGTGCCATGGGC<br>AGTACCTCTTCT       |
| Synthetic PPRE_fw                               | 5BiosgAGAAGAGG <b>TACTGCCCATGGAACTAGGTCAAAGGTCA</b> CAGAA<br>GCAATGGATGTGGCTTAT |
| Synthetic PPRE_rev                              | ATAAGCCACATCCATTGCTTCTG <b>TGACCTTTGACCT</b> AGTTCCATGGGC<br>AGTACCTCTTCT       |

PPRE sequences are indicated in bold with 5'UR plus PPRE highlighted in grey; fw, forward; rev, reverse.

## Supplementary Table 2 PPAR $\gamma$ 2-WT regulated genes

| PPAR $\gamma$ 2-WT induced genes – ranked by decreasing FC (WT vs. Control) |                      |                      |                 |                  |                 |                      |                      |
|-----------------------------------------------------------------------------|----------------------|----------------------|-----------------|------------------|-----------------|----------------------|----------------------|
| <i>Aqp7</i>                                                                 | <i>Prl2c2</i>        | <i>Mmp13</i>         | <i>Gm15441</i>  | <i>Gsn</i>       | <i>Atp6v0a1</i> | <i>Dgke</i>          | <i>Gja1</i>          |
| <i>Tmprss11f</i>                                                            | <i>Kctd12b</i>       | <i>Slc37a2</i>       | <i>Pgf</i>      | <i>Msx2</i>      | <i>Apobr</i>    | <i>Cela1</i>         | <i>Lrrc32</i>        |
| <i>Ehhadh</i>                                                               | <i>Acsbg1</i>        | <i>Dgat2</i>         | <i>Nav3</i>     | <i>Phlda3</i>    | <i>Dixdc1</i>   | <i>Agpat2</i>        | <i>Metrn1</i>        |
| <i>Angptl4</i>                                                              | <i>Adra2a</i>        | <i>Lipe</i>          | <i>Spry4</i>    | <i>Nipal1</i>    | <i>Wrb</i>      | <i>9130008F23Rik</i> | <i>Klhl25</i>        |
| <i>Cyp26b1</i>                                                              | <i>Cdk18</i>         | <i>Igf1</i>          | <i>Cobll1</i>   | <i>Tmed5</i>     | <i>Acaa2</i>    | <i>Ctsc</i>          | <i>Herc3</i>         |
| <i>Fabp4</i>                                                                | <i>Pdk4</i>          | <i>Wnk4</i>          | <i>Krt13</i>    | <i>Pnpla2</i>    | <i>Btg1</i>     | <i>Tecpr1</i>        | <i>Far1</i>          |
| <i>Pde1b</i>                                                                | <i>Slc43a1</i>       | <i>Cebpa</i>         | <i>Hic2</i>     | <i>Rab11fip1</i> | <i>lfrd1</i>    | <i>Mybl2</i>         | <i>Zmat3</i>         |
| <i>Plin5</i>                                                                | <i>Htra3</i>         | <i>Il6</i>           | <i>Adamts4</i>  | <i>Spin4</i>     | <i>Tiparp</i>   | <i>Fads3</i>         | <i>Pex14</i>         |
| <i>Hrct1</i>                                                                | <i>2310001K24Rik</i> | <i>Phospho1</i>      | <i>Klf10</i>    | <i>Slc25a20</i>  | <i>Unc119</i>   | <i>Dancr</i>         | <i>Ptpn4</i>         |
| <i>Kank3</i>                                                                | <i>Pex11a</i>        | <i>Cpt1a</i>         | <i>Arc</i>      | <i>Pcx</i>       | <i>Arhgef18</i> | <i>Fzd5</i>          | <i>Dgkh</i>          |
| <i>Cidec</i>                                                                | <i>Rasl11b</i>       | <i>Abi3</i>          | <i>Gm45928</i>  | <i>Fam212a</i>   | <i>Pitpnm1</i>  | <i>Tnfaip2</i>       | <i>Acot7</i>         |
| <i>Sema3e</i>                                                               | <i>Sema4a</i>        | <i>Ppcs</i>          | <i>Bcar3</i>    | <i>Lgr4</i>      | <i>Acadvl</i>   | <i>Pard6b</i>        | <i>Slc22a5</i>       |
| <i>Prl2c3</i>                                                               | <i>Npr3</i>          | <i>Lgals3bp</i>      | <i>Ptges</i>    | <i>Cib2</i>      | <i>Aldh9a1</i>  | <i>Cbr3</i>          | <i>Abcd3</i>         |
| <i>Prl2c4</i>                                                               | <i>Btg2</i>          | <i>Nrxn2</i>         | <i>Vamp5</i>    | <i>Dab2</i>      | <i>Apbb1ip</i>  | <i>Ereg</i>          | <i>Igfbp4</i>        |
| <i>Plin4</i>                                                                | <i>Serpine1</i>      | <i>Fgfr1</i>         | <i>Ormdl3</i>   | <i>Smpd2</i>     | <i>Col6a3</i>   | <i>Gpr137b</i>       | <i>Oxsm</i>          |
| <i>Pkp2</i>                                                                 | <i>Pcsk4</i>         | <i>Casp8</i>         | <i>Hilpda</i>   | <i>Rom1</i>      | <i>Ophn1</i>    | <i>Cdk2ap2</i>       | <i>Sulf2</i>         |
| <i>Abhd15</i>                                                               | <i>Sema7a</i>        | <i>Mmp19</i>         | <i>Reep6</i>    | <i>Pold4</i>     | <i>Soat1</i>    | <i>Nupr1</i>         | <i>Fblim1</i>        |
| <i>Stac3</i>                                                                | <i>Fah</i>           | <i>Dhrs3</i>         | <i>Hsd12</i>    | <i>Hsd3b6</i>    | <i>Ngf</i>      | <i>Gfra1</i>         | <i>Gale</i>          |
| <i>Ephx2</i>                                                                | <i>Acox1</i>         | <i>Eda2r</i>         | <i>Tle3</i>     | <i>Prune1</i>    | <i>Foxd1</i>    | <i>Cat</i>           | <i>Abcc4</i>         |
| <i>Prl2c5</i>                                                               | <i>Sema3c</i>        | <i>Txnip</i>         | <i>Adgrb2</i>   | <i>Plk3</i>      | <i>Fam107b</i>  | <i>Las1l</i>         | <i>Mindy1</i>        |
| <i>Kcnn4</i>                                                                | <i>Gzme</i>          | <i>Kcnk3</i>         | <i>St6gal1</i>  | <i>Masp1</i>     | <i>Rap1gap2</i> | <i>Slc25a22</i>      | <i>Etfdh</i>         |
| <i>Plin2</i>                                                                | <i>Acot2</i>         | <i>Ucp2</i>          | <i>Ech1</i>     | <i>Mfsd2a</i>    | <i>Hccs</i>     | <i>Hadhb</i>         | <i>Cpt2</i>          |
| <i>Nppc</i>                                                                 | <i>Tnxb</i>          | <i>Fhod3</i>         | <i>Ppp1r13l</i> | <i>Dhx32</i>     | <i>Abhd6</i>    | <i>Gprc5b</i>        | <i>Mgst1</i>         |
| <i>Plin1</i>                                                                | <i>Cd36</i>          | <i>Stk10</i>         | <i>Efna2</i>    | <i>Scarb2</i>    | <i>Tmem150a</i> | <i>1190002N15Rik</i> | <i>Jade3</i>         |
| <i>Dhrs9</i>                                                                | <i>Fitm2</i>         | <i>4732471J01Rik</i> | <i>Mgat5</i>    | <i>Tmem134</i>   | <i>Frat2</i>    | <i>Cmpk1</i>         | <i>2610318N02Rik</i> |
| <i>Mmp15</i>                                                                | <i>Rtn2</i>          | <i>Prtg</i>          | <i>Plaur</i>    | <i>S1pr3</i>     | <i>Kif3c</i>    | <i>Cdkn1a</i>        | <i>B4galt1</i>       |
| <i>Mycl</i>                                                                 | <i>Sh2d3c</i>        | <i>Tgfb2</i>         | <i>Mcrip2</i>   | <i>Iqck</i>      | <i>Stat5a</i>   | <i>Il4ra</i>         | <i>Chp1</i>          |
| <i>Hcrtr1</i>                                                               | <i>Klf11</i>         | <i>Has2</i>          | <i>Far1os</i>   | <i>Pik3r5</i>    | <i>Sash1</i>    | <i>Snhg3</i>         | <i>Man1a</i>         |
| <i>Trem2</i>                                                                | <i>Tinagl1</i>       | <i>Atp10d</i>        | <i>Rreb1</i>    | <i>Lpcat3</i>    | <i>Rflnb</i>    | <i>Baiap2</i>        | <i>Mttr10</i>        |
| <i>Ifit1</i>                                                                | <i>Deptor</i>        | <i>Hmox1</i>         | <i>Fosl1</i>    | <i>Mertk</i>     | <i>Hif1a</i>    | <i>Zcchc10</i>       | <i>Phactr4</i>       |
| <i>Lpl</i>                                                                  | <i>Clcf1</i>         | <i>Ermp1</i>         | <i>Stom</i>     | <i>Nr1d1</i>     | <i>Fdx1</i>     | <i>Usp38</i>         | <i>Iqsec1</i>        |
| <i>Hr</i>                                                                   | <i>Onecut2</i>       | <i>Ccl9</i>          | <i>Rgs17</i>    | <i>Klf5</i>      | <i>Ccdc85b</i>  | <i>Slc35d1</i>       |                      |
| <i>Mlph</i>                                                                 | <i>Areg</i>          | <i>Itgb3</i>         | <i>Efnb1</i>    | <i>Egln3</i>     | <i>Peg10</i>    | <i>Foxred2</i>       |                      |
| <i>Lgals4</i>                                                               | <i>Trim25</i>        | <i>Pim3</i>          | <i>Prkcd</i>    | <i>Irs2</i>      | <i>Creld1</i>   | <i>Ttyh2</i>         |                      |

## Supplementary Table 3 GO-categories of PPAR $\gamma$ 2-WT regulated genes

| Top 15 PPAR $\gamma$ 2-WT-induced and -repressed genes |                                                                                                                                                                                                     |                                    |                                                                                      |
|--------------------------------------------------------|-----------------------------------------------------------------------------------------------------------------------------------------------------------------------------------------------------|------------------------------------|--------------------------------------------------------------------------------------|
| PPAR $\gamma$ 2-WT induced genes                       |                                                                                                                                                                                                     | PPAR $\gamma$ 2-WT repressed genes |                                                                                      |
| Gene                                                   | Adipocyte related GO-Categories                                                                                                                                                                     | Gene                               | Adipocyte related GO Categories                                                      |
| <i>Aqp7</i>                                            | Glycerol transport                                                                                                                                                                                  | <i>Lvrn</i>                        | -                                                                                    |
| <i>Tmprss11f</i>                                       | -                                                                                                                                                                                                   | <i>Nsun7</i>                       | -                                                                                    |
| <i>Ehhadh</i>                                          | Fatty acid beta-oxidation                                                                                                                                                                           | <i>Cobl</i>                        | -                                                                                    |
| <i>Angptl4</i>                                         | Lipid metabolic process<br>Triglyceride homeostasis<br>Positive regulation of lipid metabolic process<br>Negative regulation of lipoprotein lipase activity<br>Cellular response to cell starvation | <i>Ptx3</i>                        | -                                                                                    |
| <i>Cyp26b1</i>                                         | Lipid metabolic process                                                                                                                                                                             | <i>Maf</i>                         | -                                                                                    |
| <i>Fabp4</i>                                           | Fatty acid metabolic process<br>Long-chain fatty acid transport<br>White/brown fat cell differentiation                                                                                             | <i>Adamts5</i>                     | -                                                                                    |
| <i>Pde1b</i>                                           | Cyclic-nucleotide phosphodiesterase activity                                                                                                                                                        | <i>Sync</i>                        | -                                                                                    |
| <i>Plin5</i>                                           | Lipid droplet organization<br>Regulation of fatty acid beta-oxidation<br>Positive regulation of triacylglycerol biosynthetic process                                                                | <i>Krt80</i>                       | -                                                                                    |
| <i>Hrct1</i>                                           | -                                                                                                                                                                                                   | <i>Inhbb</i>                       | Negative regulation of insulin secretion<br>Cellular response to cholesterol         |
| <i>Kank3</i>                                           | -                                                                                                                                                                                                   | <i>Arrdc1</i>                      | -                                                                                    |
| <i>Cidec</i>                                           | Lipid droplet organization                                                                                                                                                                          | <i>Hacd4</i>                       | Sphingolipid biosynthetic process<br>Very long-chain fatty acid biosynthetic process |
| <i>Sema3e</i>                                          | -                                                                                                                                                                                                   | <i>Cemip</i>                       | -                                                                                    |
| <i>Prl2c3</i>                                          | Response to nutrient levels                                                                                                                                                                         | <i>Ctgf</i>                        | Insulin-like growth factor binding                                                   |
| <i>Prl2c4</i>                                          | Response to nutrient levels                                                                                                                                                                         | <i>Gbp2</i>                        | -                                                                                    |
| <i>Plin4</i>                                           | No assigned GO-Categories. Lipid droplet protein, expected to play a role in triglyceride packaging into adipocytes                                                                                 | <i>Igsf10</i>                      | -                                                                                    |

## Supplementary Table 4 Genes contributing to PCA

| Top 20 genes contributing to principal component analysis |                                                                                                                                                                                                     |                |                                                                                                                                                                                                     |
|-----------------------------------------------------------|-----------------------------------------------------------------------------------------------------------------------------------------------------------------------------------------------------|----------------|-----------------------------------------------------------------------------------------------------------------------------------------------------------------------------------------------------|
| PC1                                                       |                                                                                                                                                                                                     | PC2            |                                                                                                                                                                                                     |
| Gene                                                      | Adipocyte related GO-Categories                                                                                                                                                                     | Gene           | Adipocyte related GO Categories                                                                                                                                                                     |
| <i>Fabp4</i>                                              | Fatty acid metabolic process<br>Long-chain fatty acid transport<br>White/brown fat cell differentiation                                                                                             | <i>Pdk4</i>    | Cellular response to fatty acid<br>Cellular response to starvation<br>Glucose homeostasis<br>Regulation of fatty acid oxidation<br>Insulin receptor signalling pathway                              |
| <i>Angptl4</i>                                            | Lipid metabolic process<br>Triglyceride homeostasis<br>Positive regulation of lipid metabolic process<br>Negative regulation of lipoprotein lipase activity<br>Cellular response to cell starvation | <i>Fabp4</i>   | Fatty acid metabolic process<br>Long-chain fatty acid transport<br>Fat cell differentiation                                                                                                         |
| <i>Prl2c3</i>                                             | Response to nutrient levels                                                                                                                                                                         | <i>Angptl4</i> | Lipid metabolic process<br>Triglyceride homeostasis<br>Positive regulation of lipid metabolic process<br>Negative regulation of lipoprotein lipase activity<br>Cellular response to cell starvation |
| <i>Prl2c4</i>                                             | Response to nutrient levels                                                                                                                                                                         | <i>Sema3e</i>  | -                                                                                                                                                                                                   |
| <i>Plin2</i>                                              | Lipid storage<br>Long-chain fatty acid transport<br>Positive regulation of sequestering of triglyceride                                                                                             | <i>Lpl</i>     | Cellular response to fatty acid/nutrient<br>Fatty acid/triglyceride biosynthetic process<br>Lipid catabolic process<br>Positive regulation of fat cell differentiation                              |
| <i>Pkp2</i>                                               | Lipid homeostasis                                                                                                                                                                                   | <i>Dhrs9</i>   | Lipid metabolic process                                                                                                                                                                             |
| <i>Kank3</i>                                              |                                                                                                                                                                                                     | <i>Pcx</i>     | Lipid metabolic process<br>Positive regulation of phospholipid biosynthetic process                                                                                                                 |
| <i>Prl2c2</i>                                             | Response to nutrient levels                                                                                                                                                                         | <i>Acot2</i>   | Acyl-CoA metabolic process<br>Fatty acid/long-chain/very long-chain fatty acid metabolic process                                                                                                    |
| <i>Cyp26b1</i>                                            | Lipid metabolic process                                                                                                                                                                             | <i>Cpt1a</i>   | Cellular response to fatty acid<br>Fatty acid beta-oxidation<br>Glucose metabolic process<br>Regulation of insulin secretion<br>Long-chain fatty acid/triglyceride metabolic process                |
| <i>Sema3e</i>                                             | -                                                                                                                                                                                                   | <i>Thbd</i>    | -                                                                                                                                                                                                   |
| <i>Lpl</i>                                                | Cellular response to fatty acid/nutrient<br>Fatty acid/triglyceride biosynthetic process<br>Lipid catabolic process<br>Positive regulation of fat cell differentiation                              | <i>Ucp2</i>    | Response to fatty acid<br>Cellular response to glucose/insulin stimulation                                                                                                                          |
| <i>Cdk18</i>                                              | -                                                                                                                                                                                                   | <i>Ptgs2</i>   | Response to fatty acid<br>Positive regulation of brown fat cell differentiation                                                                                                                     |
| <i>Plin4</i>                                              | No assigned GO-Categories. Lipid droplet protein, expected to play a role in triglyceride packaging into adipocytes                                                                                 | <i>Sema3c</i>  | -                                                                                                                                                                                                   |
| <i>Dhrs9</i>                                              | Lipid metabolic process                                                                                                                                                                             | <i>Il4ra</i>   | -                                                                                                                                                                                                   |
| <i>Serpine1</i>                                           | -                                                                                                                                                                                                   | <i>Cyp26b1</i> | Lipid metabolic process                                                                                                                                                                             |
| <i>Pde1b</i>                                              | Cyclic-nucleotide phosphodiesterase activity                                                                                                                                                        | <i>Plin2</i>   | Lipid storage<br>Long-chain fatty acid transport<br>Positive regulation of sequestering of triglyceride                                                                                             |
| <i>Sema7a</i>                                             | -                                                                                                                                                                                                   | <i>Il1rl1</i>  | -                                                                                                                                                                                                   |
| <i>Pdk4</i>                                               | Cellular response to fatty acid<br>Cellular response to starvation<br>Glucose homeostasis<br>Regulation of fatty acid oxidation<br>Insulin receptor signalling pathway                              | <i>Adamts1</i> | -                                                                                                                                                                                                   |
| <i>Acox1</i>                                              | Fatty acid beta-oxidation<br>Lipid homeostasis                                                                                                                                                      | <i>Hmox1</i>   | -                                                                                                                                                                                                   |
| <i>Cpt1a</i>                                              | Cellular response to fatty acid<br>Fatty acid beta-oxidation<br>Glucose metabolic process<br>Regulation of insulin secretion<br>Long-chain fatty acid/triglyceride metabolic process                | <i>Peg10</i>   | Cell differentiation (adipocytes)                                                                                                                                                                   |

## Supplementary Table 5 Mutation sensitive genes

| Mutation sensitive genes – ranked by increasing FC (Mut vs. WT) |                 |                 |                      |                 |                      |                 |                |
|-----------------------------------------------------------------|-----------------|-----------------|----------------------|-----------------|----------------------|-----------------|----------------|
| <b>E379K-sensitive genes</b>                                    |                 |                 |                      |                 |                      |                 |                |
| <i>Plin5</i>                                                    | <i>Kank3</i>    | <i>Prl2c2</i>   | <i>Gsn</i>           | <i>Ptpn4</i>    | <i>Usp38</i>         | <i>Gpr137b</i>  | <i>Man1a</i>   |
| <i>Fabp4</i>                                                    | <i>Prl2c4</i>   | <i>Pcx</i>      | <i>Clcf1</i>         | <i>Bcar3</i>    | <i>Lgr4</i>          | <i>St6gal1</i>  | <i>Tmem134</i> |
| <i>Cidec</i>                                                    | <i>Mycl</i>     | <i>Deptor</i>   | <i>Metrn1</i>        | <i>Hic2</i>     | <i>1190002N15Rik</i> | <i>Phlda3</i>   | <i>Cdk2ap2</i> |
| <i>Sema3e</i>                                                   | <i>Fitm2</i>    | <i>Cdk18</i>    | <i>Agpat2</i>        | <i>Igfbp4</i>   | <i>Gale</i>          | <i>Pitpnm1</i>  | <i>Acox1</i>   |
| <i>Prl2c5</i>                                                   | <i>Sema7a</i>   | <i>Rreb1</i>    | <i>Egln3</i>         | <i>Plin2</i>    | <i>Prkcd</i>         | <i>Dhx32</i>    | <i>Sema3c</i>  |
| <i>Sema4a</i>                                                   | <i>Vamp5</i>    | <i>Ermp1</i>    | <i>Btg2</i>          | <i>Pkp2</i>     | <i>Baiap2</i>        | <i>Tiparp</i>   | <i>Plaur</i>   |
| <i>Dhrs9</i>                                                    | <i>Lgals3bp</i> | <i>Klf5</i>     | <i>Mmp19</i>         | <i>Dab2</i>     | <i>Rap1gap2</i>      | <i>Mertk</i>    | <i>Hif1a</i>   |
| <i>Abhd15</i>                                                   | <i>Stat5a</i>   | <i>Mgst1</i>    | <i>Plk3</i>          | <i>Fdx1</i>     | <i>Soat1</i>         | <i>Pold4</i>    |                |
| <i>Lpl</i>                                                      | <i>Cebpa</i>    | <i>Adamts4</i>  | <i>Foxred2</i>       | <i>Col6a3</i>   | <i>Nav3</i>          | <i>Ttyh2</i>    |                |
| <i>Ephx2</i>                                                    | <i>Fgfr1</i>    | <i>Lipe</i>     | <i>Serpine1</i>      | <i>Fam107b</i>  | <i>Jade3</i>         | <i>Chp1</i>     |                |
| <i>Cd36</i>                                                     | <i>Spry4</i>    | <i>Peg10</i>    | <i>Casp8</i>         | <i>Rgs17</i>    | <i>Gm45928</i>       | <i>Phactr4</i>  |                |
| <i>Plin4</i>                                                    | <i>Ccl9</i>     | <i>Unc119</i>   | <i>Fads3</i>         | <i>Nipal1</i>   | <i>Trim25</i>        | <i>Kif3c</i>    |                |
| <i>Prl2c3</i>                                                   | <i>Stk10</i>    | <i>Tle3</i>     | <i>Itgb3</i>         | <i>Pim3</i>     | <i>Wrb</i>           | <i>Far1</i>     |                |
| <b>R212Q-sensitive genes</b>                                    |                 |                 |                      |                 |                      |                 |                |
| <i>Fabp4</i>                                                    | <i>Cdk18</i>    | <i>Hic2</i>     | <i>Foxred2</i>       | <i>Irs2</i>     | <i>Sash1</i>         | <i>Nr1d1</i>    | <i>Pitpnm1</i> |
| <i>Cidec</i>                                                    | <i>Btg2</i>     | <i>Ermp1</i>    | <i>Trim25</i>        | <i>Mertk</i>    | <i>Usp38</i>         | <i>Mtmr10</i>   | <i>Alah9a1</i> |
| <i>Sema3e</i>                                                   | <i>Lgals3bp</i> | <i>Bicdl1</i>   | <i>Nav3</i>          | <i>Agpat2</i>   | <i>Sema6d</i>        | <i>Ppcs</i>     | <i>Jade3</i>   |
| <i>Lpl</i>                                                      | <i>Deptor</i>   | <i>Unc119</i>   | <i>Pard6b</i>        | <i>Soat1</i>    | <i>Arhgef18</i>      | <i>Rgs17</i>    | <i>Gprc5b</i>  |
| <i>Dhrs9</i>                                                    | <i>Mycl</i>     | <i>Tinagl1</i>  | <i>Tle3</i>          | <i>Tecpr1</i>   | <i>Stk10</i>         | <i>Wrb</i>      | <i>Itgb3</i>   |
| <i>Prl2c5</i>                                                   | <i>Pcx</i>      | <i>Pex11a</i>   | <i>Tiparp</i>        | <i>Plk3</i>     | <i>Ophn1</i>         | <i>Tmem134</i>  | <i>Btg1</i>    |
| <i>Hrct1</i>                                                    | <i>Arc</i>      | <i>Ccl9</i>     | <i>Ctsc</i>          | <i>Fam107b</i>  | <i>Mmp19</i>         | <i>St6gal1</i>  | <i>Iqsec1</i>  |
| <i>Pkp2</i>                                                     | <i>Cd80</i>     | <i>Rap1gap2</i> | <i>Rreb1</i>         | <i>Stom</i>     | <i>Acadvl</i>        | <i>Chp1</i>     | <i>Ttyh2</i>   |
| <i>Prl2c3</i>                                                   | <i>Fah</i>      | <i>Plin2</i>    | <i>Txnip</i>         | <i>Fads3</i>    | <i>Dab2</i>          | <i>Ccdc85b</i>  | <i>Masp1</i>   |
| <i>Prl2c4</i>                                                   | <i>Fitm2</i>    | <i>Angptl4</i>  | <i>Bcar3</i>         | <i>Fdx1</i>     | <i>Igfbp4</i>        | <i>Mybl2</i>    | <i>Cdk2ap2</i> |
| <i>Onecut2</i>                                                  | <i>Kcnk3</i>    | <i>Peg10</i>    | <i>Abi3</i>          | <i>Hif1a</i>    | <i>Las1l</i>         | <i>Cobll1</i>   | <i>Zmat3</i>   |
| <i>Cd36</i>                                                     | <i>Spry4</i>    | <i>Fgfr1</i>    | <i>Phospho1</i>      | <i>Kif3c</i>    | <i>Fzd5</i>          | <i>Far1</i>     | <i>Hccs</i>    |
| <i>Ephx2</i>                                                    | <i>Adamts4</i>  | <i>Gm15441</i>  | <i>Mgat5</i>         | <i>Smpd2</i>    | <i>Fos1</i>          | <i>Slc25a22</i> | <i>Hadhb</i>   |
| <i>Igf1</i>                                                     | <i>Prl2c2</i>   | <i>Prss22</i>   | <i>Ppp1r13l</i>      | <i>Col6a3</i>   | <i>Col18a1</i>       | <i>Apbb1ip</i>  | <i>Acox1</i>   |
| <i>Kank3</i>                                                    | <i>Casp8</i>    | <i>Efnb1</i>    | <i>Phlda3</i>        | <i>Eda2r</i>    | <i>Clcf1</i>         | <i>Gale</i>     |                |
| <i>Cebpa</i>                                                    | <i>Pim3</i>     | <i>Gsn</i>      | <i>Iqck</i>          | <i>Scarb2</i>   | <i>Fblim1</i>        | <i>Pex14</i>    |                |
| <i>Abhd15</i>                                                   | <i>Vamp5</i>    | <i>Cyp26b1</i>  | <i>Lgr4</i>          | <i>Serpine1</i> | <i>Baiap2</i>        | <i>Lpcat3</i>   |                |
| <i>Pcsk4</i>                                                    | <i>Sema7a</i>   | <i>Prkcd</i>    | <i>1190002N15Rik</i> | <i>Metrn1</i>   | <i>Phactr4</i>       | <i>Pnpla2</i>   |                |

## Supplementary Figures

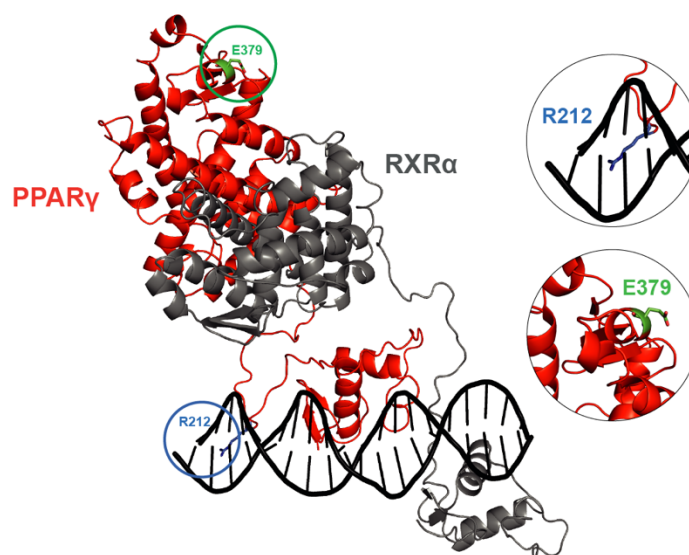

**Supplementary Fig. 1. Solution structure of PPAR $\gamma$ -RXR $\alpha$ -DNA complex.** Solution structure of PPAR $\gamma$ -RXR $\alpha$  (PPAR $\gamma$  in red; RXR $\alpha$  in grey) obtained by small-angle X-ray scattering (SAXS) (Osz et al., 2012). The circles indicate the magnified regions showing glutamic acid 379 (in green) and arginine 212 (in blue) in the hinge region of PPAR $\gamma$ . The figure was generated by open source software PyMOL 099rc6 ([www.pymol.org](http://www.pymol.org)).

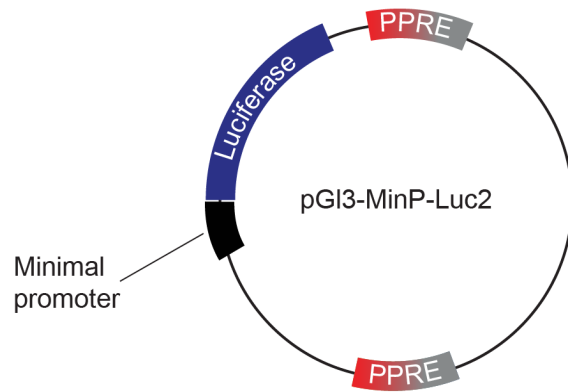

|                 |    | PPAR $\gamma$ | RXR $\alpha$ |    |
|-----------------|----|---------------|--------------|----|
| Lpl WT          | 5' | AAGAAGGGGA    | AAGGGCA      | 3' |
| 5' UR mut Lpl   | 5' | ACGAAGGGGA    | AAGGGCA      | 3' |
| Cidec WT        | 5' | CACTAGGCAAG   | AAGGGCA      | 3' |
| 5' UR mut Cidec | 5' | CCCAAGGCAAG   | AAGGGCA      | 3' |
| Synthetic PPRE  | 5' | AACTAGGTCA    | AAGGTCA      | 3' |

**Supplementary Fig. 2. Schematic representations of reporter constructs.** Schematic representation of the pGL3-MinP-Luc2 reporters used, including the DNA sequences.



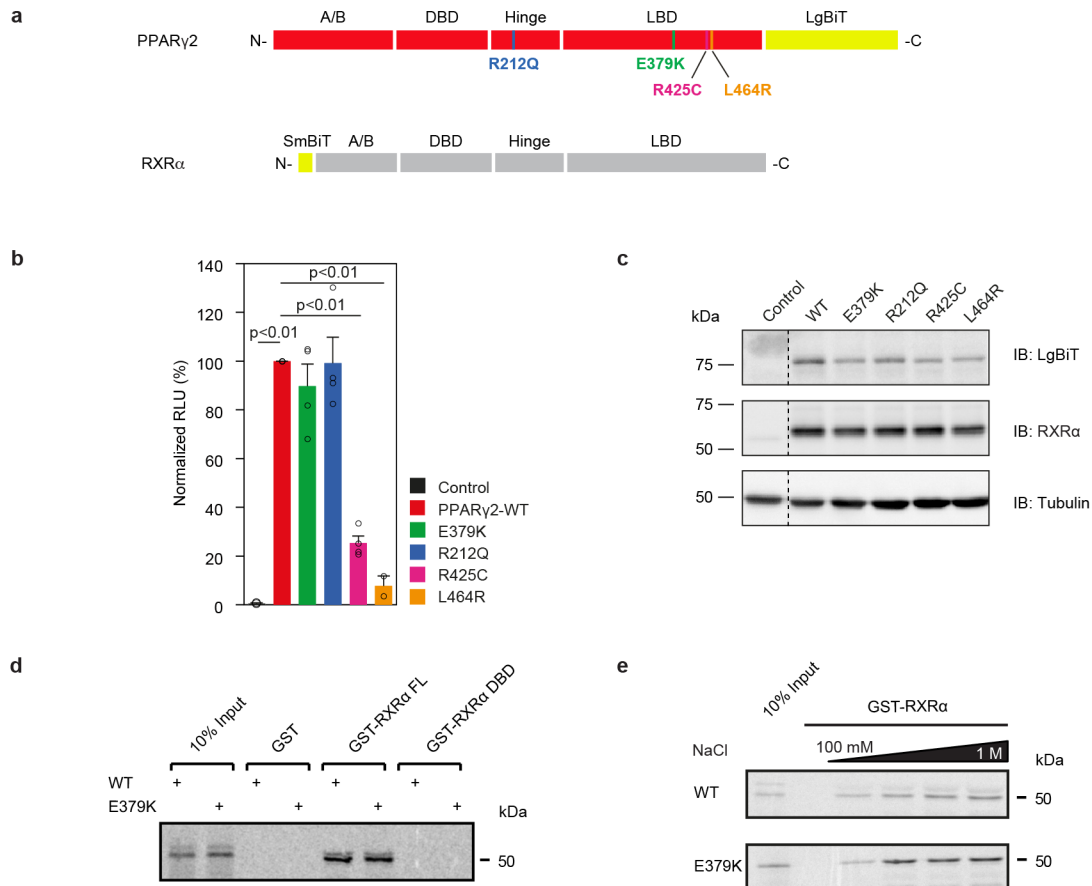

**Supplementary Fig. 3 The E379K and R212Q mutants heterodimerize with RXR $\alpha$  in the absence of DNA binding.** **a** Schematic representation of the split-luciferase fusion proteins. **b** HEK293T cells were transfected with SmBiT-RXR $\alpha$  and various PPAR $\gamma$ -LgBiT constructs as indicated in the figure. Luciferase activity is expressed relative to PPAR $\gamma$ 2-wt (100%). Data are presented as mean values + SEM with individual data points indicated with circles, n=4 biologically independent experiments. Source data are provided as a Source Data file. **c** Expression of the different LgBiT and SmBiT fusion proteins overexpressed in HEK293T cells, as assessed by Western blot using an LgBiT and RXR $\alpha$  antibody, respectively. WT, wildtype. **d** GST RXR $\alpha$  fusion proteins (full length or RXR $\alpha$  DBD) coupled to glutathione-Sepharose beads were incubated with [35S] methionine-labelled PPAR $\gamma$  (WT or E379K) to determine the effect of E379K on heterodimerization with binding partner RXR $\alpha$ . GST alone was used as a negative control. 10% of the total lysate of the [35S] methionine-labelled PPAR $\gamma$  proteins used for the pull-down assay was applied as control (input). **e** GST-RXR $\alpha$  was incubated with the [35S] methionine-labelled PPAR $\gamma$  proteins in the presence of increasing concentrations of sodium chloride (NaCl).

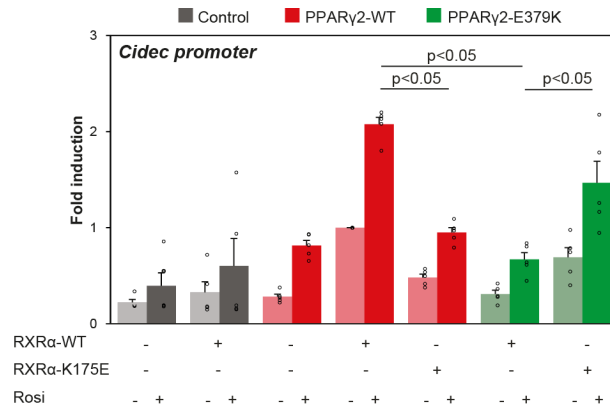

**Supplementary Fig. 4. The PPARγ-E379K mutation alters interaction with RXRα** HEK293T cells were transiently cotransfected with expression vectors encoding WT or mutant PPARγ, WT or mutant RXRα, and the *Cidec*(promoter)-reporter, in the absence or presence of 1 μM rosiglitazone. Activation of the reporter is expressed as fold induction over that with empty vector (control). Data are presented as mean values + SEM with individual data points indicated with circles, n=3-5 biologically independent experiments. One-way ANOVA with Tukey's multiple comparisons were used to compare cells transfected with mutant vs. WT; \*p<0.05. Source data are provided in the Source Data file.

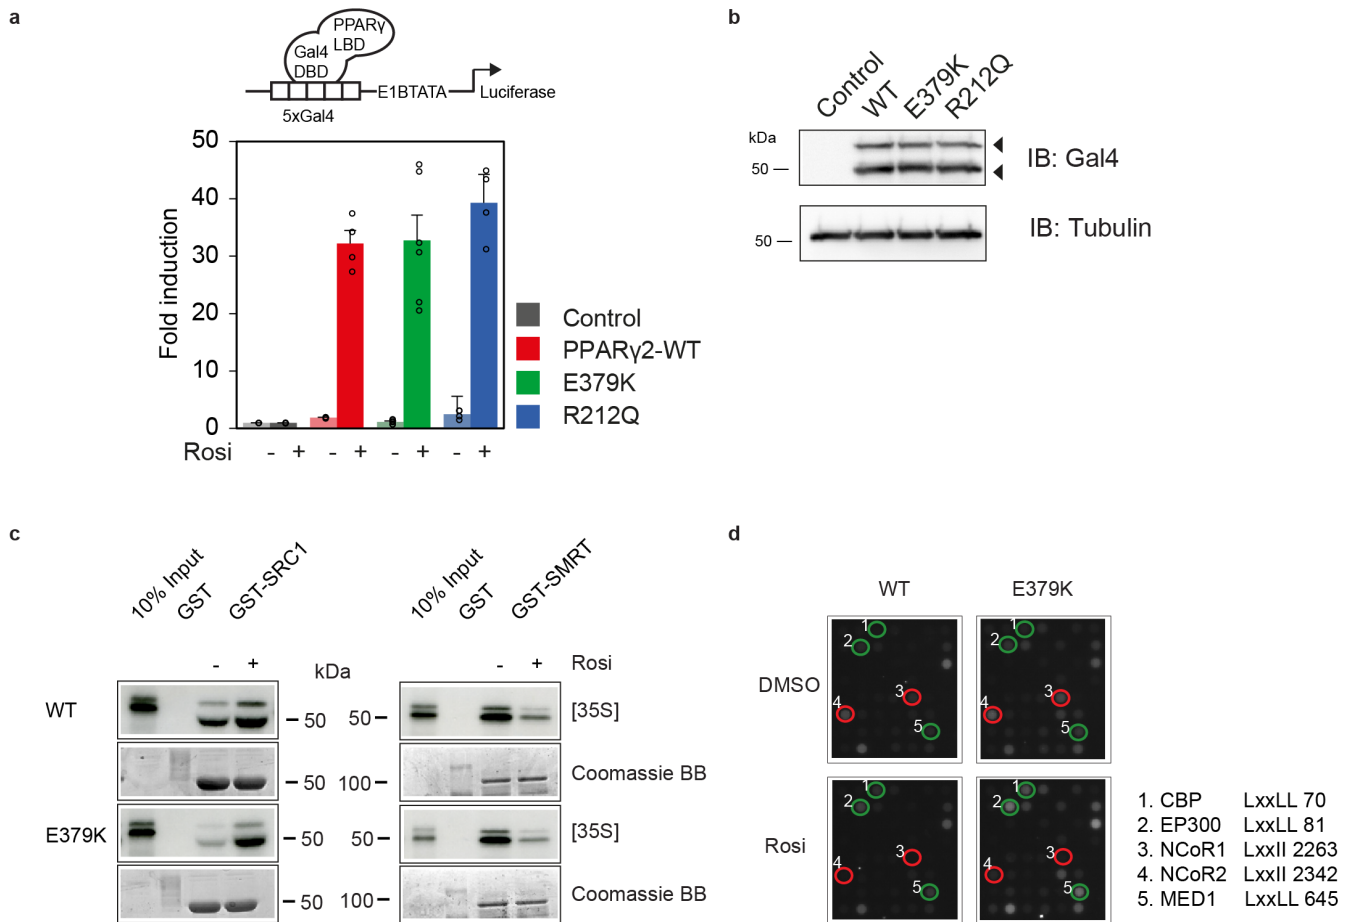

**Supplementary Fig. 5. E379K does not interfere with ligand-dependent coregulator interactions and activation.** **a** U2OS cells were transfected with chimeric Gal4 DBD-hPPAR $\gamma$  LBD wildtype, E379K and R212Q fusion proteins and 5xGal4-E1BTATA-Luciferase. Cells were treated with or without 1  $\mu$ M rosiglitazone. Data are presented as mean values + SEM with individual data points indicated with circles, n=4-6 biologically independent experiments. **b** Expression of the different Gal4DBD fusion proteins overexpressed in U2OS cells, as assessed by Western blot using a Gal4DBD antibody. Control, empty vector control; WT, wildtype. **c** GST-SRC1 and GST-SMRT coupled to glutathione-Sepharose beads were incubated with [ $^{35}$ S] methionine-labelled PPAR $\gamma$  (WT or E379K) to determine the effect of E379K on binding to these coregulator proteins, in the absence (-) or presence (+) of 10  $\mu$ M rosiglitazone. GST alone was used as a negative control. 10% of the total lysate of the [ $^{35}$ S] methionine-labelled PPAR $\gamma$  proteins used for the pull-down assay was applied as control (input). Levels of GST proteins were confirmed by Coomassie BB staining. **d** PamGene<sup>®</sup> chips containing 53 different cofactor derived peptides (containing either LxxLL or LxxxLxxxL motifs) were incubated with recombinant GST-PPAR $\gamma$ -LBD WT or E379K and anti-GST-alexa in the absence (-) or presence (+) of 10  $\mu$ M rosiglitazone. After 100 pump cycles a CCD camera recorded fluorescence, showing PPAR $\gamma$ -coregulator interactions as bright spots. As examples, three coactivator motifs (CBP, EP300 and MED1; in green) and two corepressor motifs (NCoR1 and NCoR2; in red) are encircled.

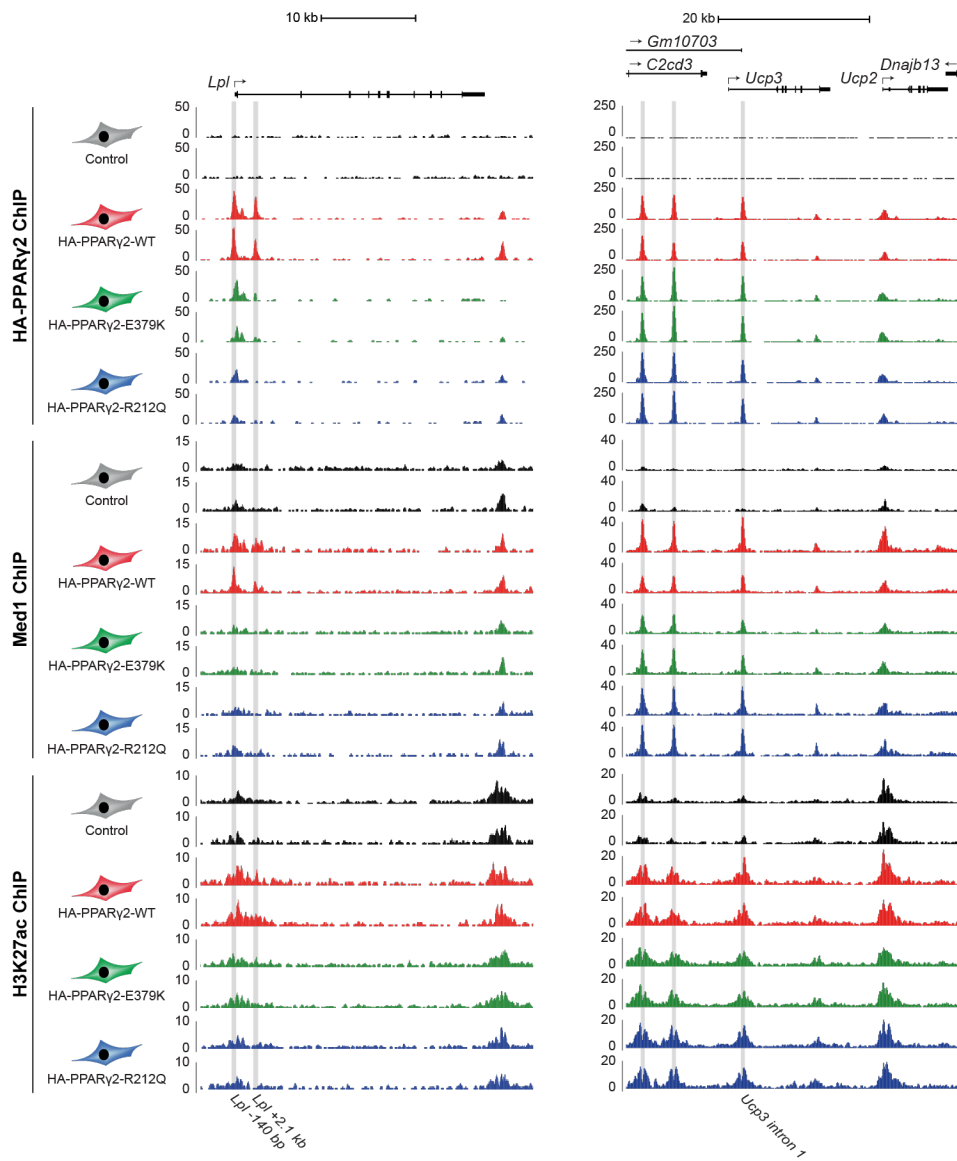

**Supplementary Fig. 6. Genome browser tracks of HA-PPAR $\gamma$ 2, H3K27ac and Med1 ChIP-seq.** UCSC Genome Browser tracks of HA-PPAR $\gamma$ 2, Med1 and H3K27ac ChIP-seq in PPAR $\gamma$ <sup>-/-</sup>MEF-CAR cells induced to express WT or mutant PPAR $\gamma$ , in the vicinity of *Lpl* (left) and *Ucp3* (right). PPAR $\gamma$ -target enhancers are highlighted.

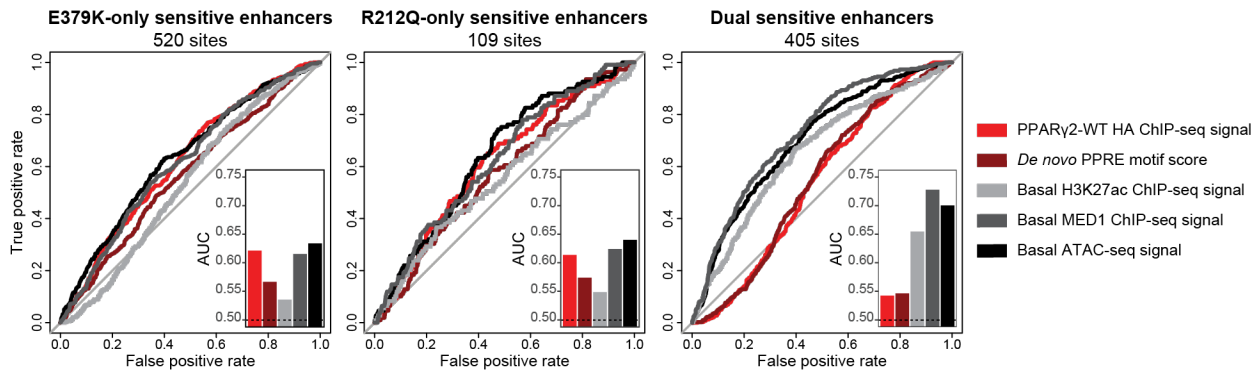

**Supplementary Fig. 7. Basal enhancer characteristics predicts dual sensitive enhancers.** Receiver operating characteristic (ROC)-analysis showing the discriminate capacity of the determinants HA-PPAR $\gamma$  ChIP WT-seq signal, *de novo* PPRE motif score, basal H3K27ac and Med1 ChIP-seq signal, and basal ATAC-seq signal for enhancers sensitive or not to only E379K mutation (left), only R212Q mutation (middle), or dual sensitive enhancers (right). Insert, area under curve (AUC) plot summarizing the entire location of the ROC curves. Source data are provided in the Source Data file.

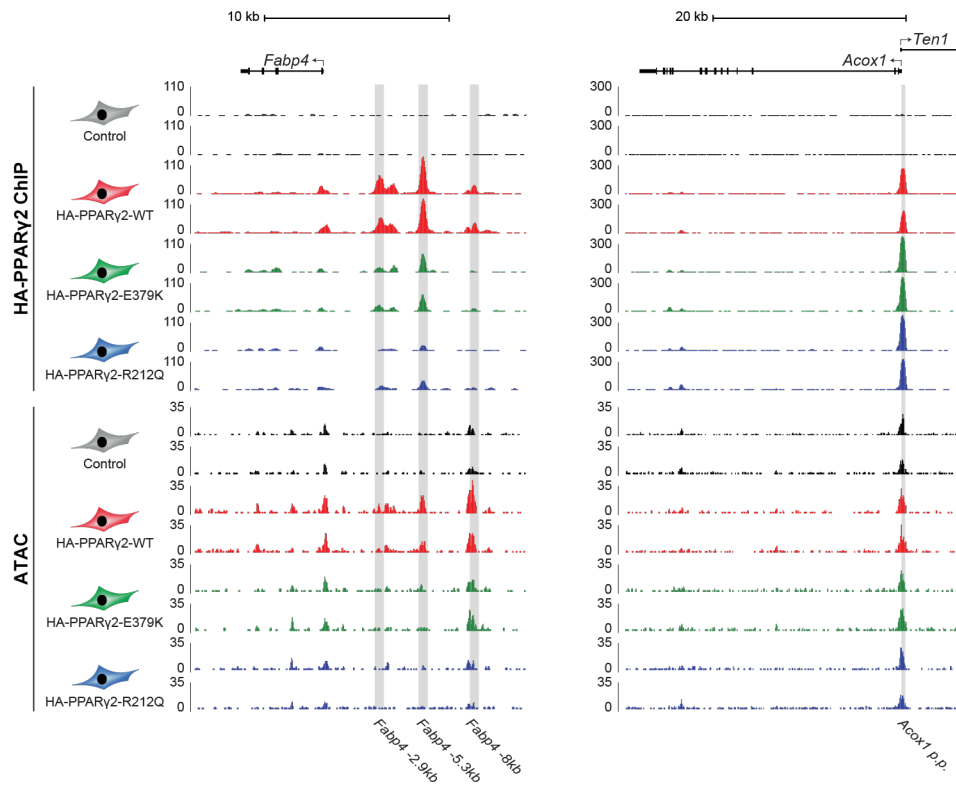

**Supplementary Fig. 8. Genome browser tracks of ATAC-seq and HA-PPAR $\gamma$ 2 ChIP-seq.** UCSC Genome Browser tracks of HA-PPAR $\gamma$ 2 ChIP-seq and ATAC-seq with highlighted PPAR $\gamma$ -target enhancers in the vicinity of *Fbp4* (basal inaccessible enhancers), and *Acox1* (basal accessible enhancer).

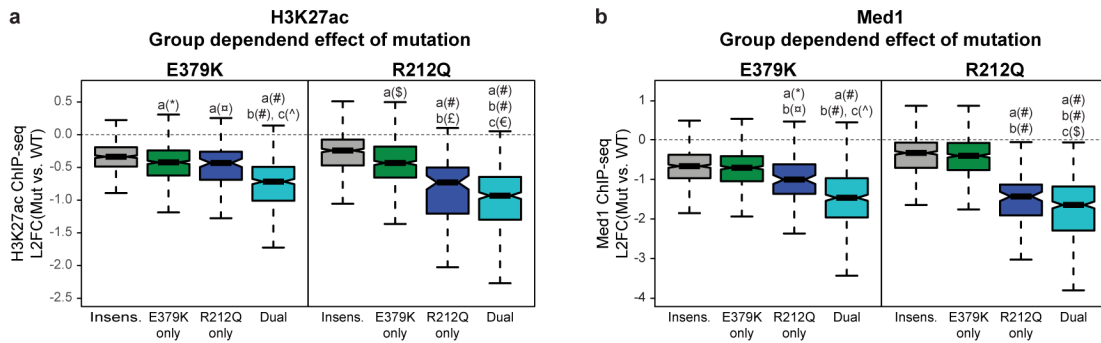

**Supplementary Fig. 9. Mutation-dependent effect on H3K27ac and Med1.** Boxplots showing the ability of E379K (left) and R212Q (right) to induce changes in **a** H3K27ac and **b** Med1 ChIP-seq signal compared to PPAR $\gamma$ 2-WT in the different enhancer groups (L2FC, log<sub>2</sub> fold change). Significance was assessed by two-sided pairwise Wilcoxon rank sum tests with Benjamini–Hochberg correction, a, versus insensitive enhancer group (n=519); b, versus E379K-only sensitive enhancer group (n=520); c, versus R212Q-only sensitive enhancer group (n=109), dual sensitive enhancer group (n=405). \*p=1.2e-7,  $\alpha$  p=0.0003, # p<2e-16, ^ p=1.2e-11, \$ p=6.7e-13, £ p=1.3e-12, € p=0.0017. b) \* p=5.7e-8,  $\alpha$  p=7.4e-6, # p<2e-16, ^ p=1.9e-9, \$ p= 0.028. Data in boxplots are presented as notch, median; box, first and third quartiles; whiskers, 1.5 times the interquartile range. Source data are provided in the Source Data file.

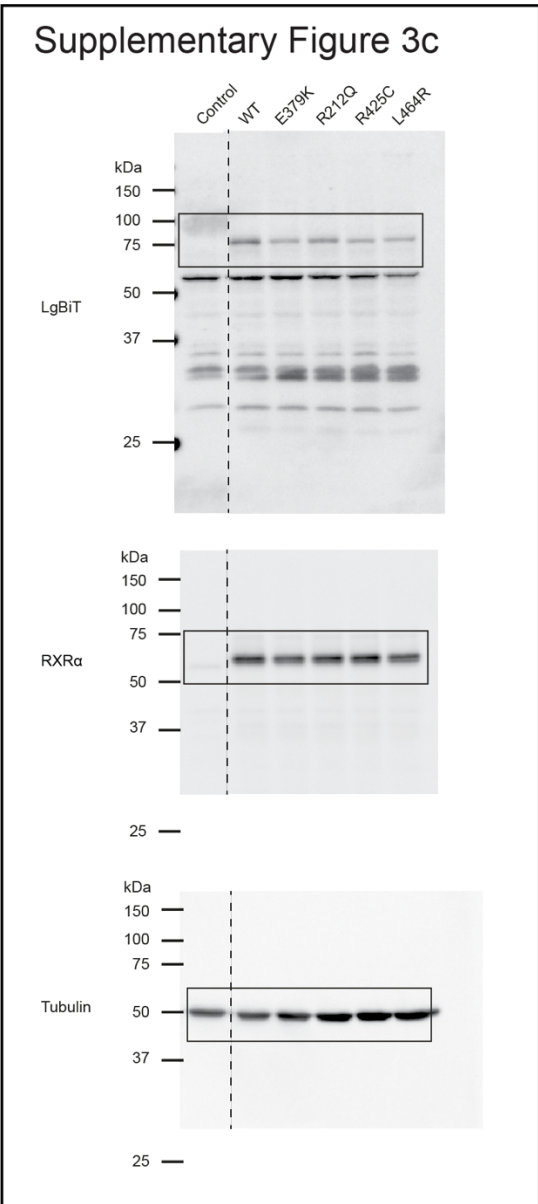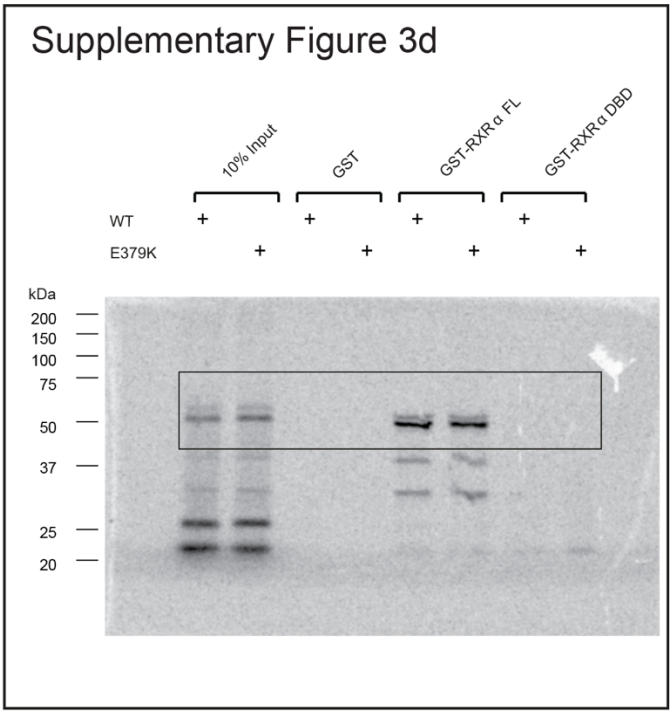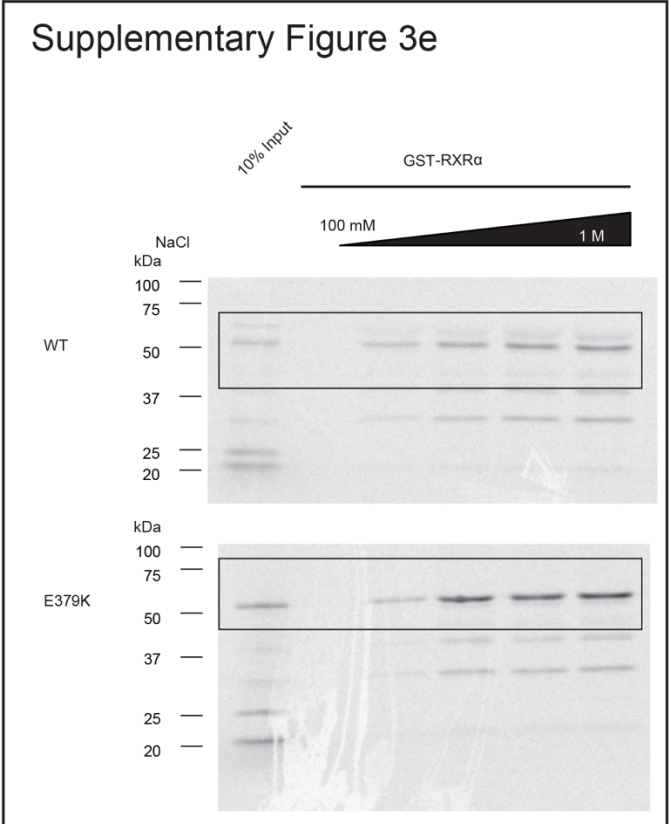

**Supplementary Fig. 10. Original blots corresponding to Supplementary Fig. 3c, 3d and 3e.** Each blot is labeled with its own panel identification tag. Also indicated are the antigens detected and a box around the area represented in Supplementary Fig. 3c, 3d and 3e.



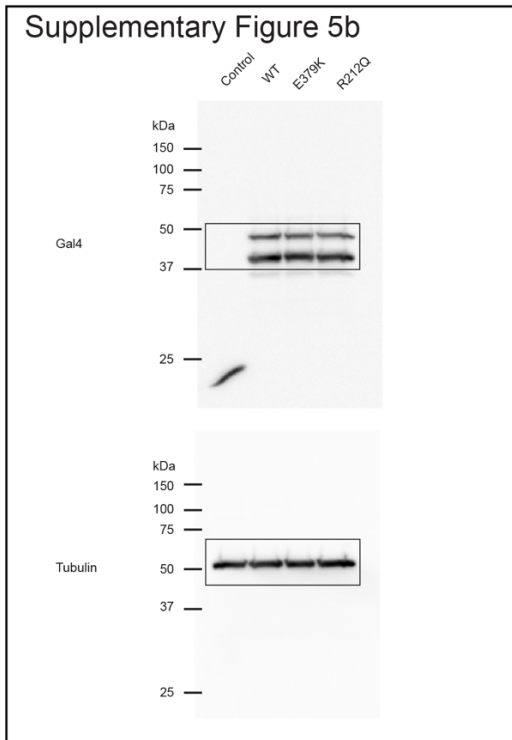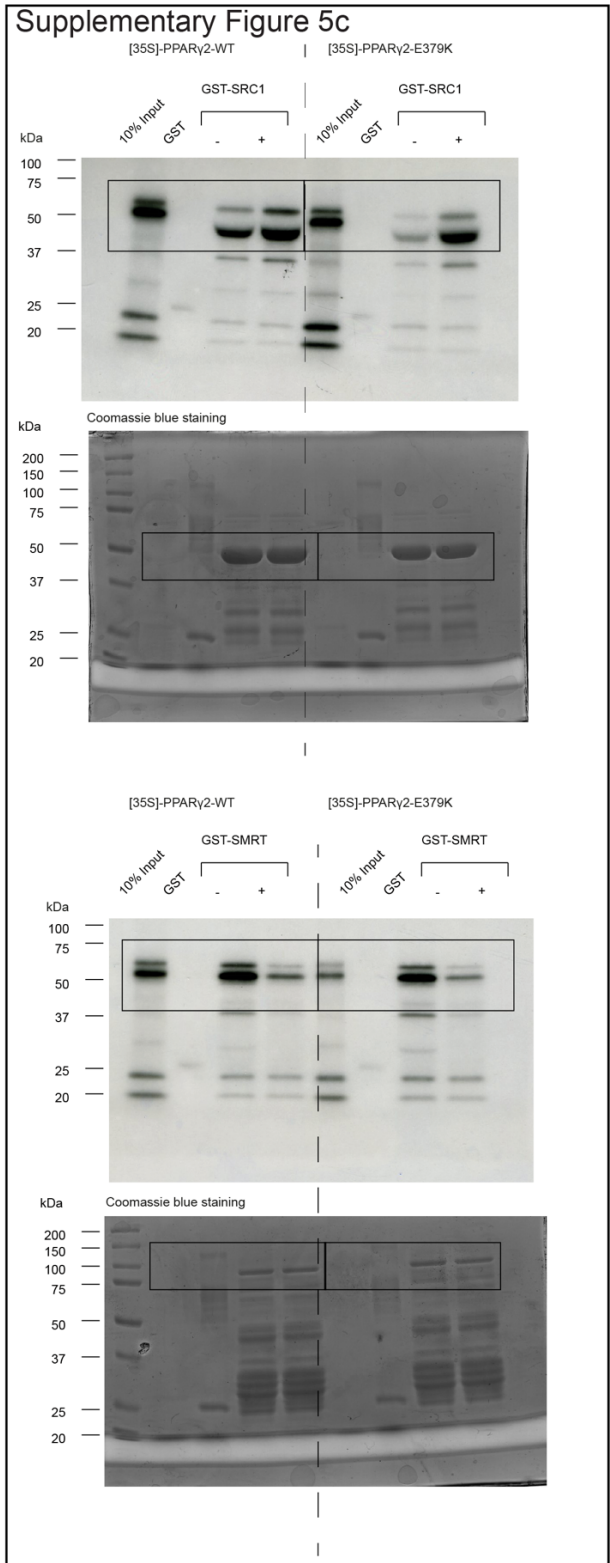

**Supplementary Fig. 11. Original blots corresponding to Supplementary Fig. 5b and 5c.** Each blot is labeled with its own panel identification tag. Also indicated are the antigens detected and a box around the area represented in Supplementary Fig. 5b and 5c. The dotted line indicates where the Western blot was cut to delete an irrelevant lane.

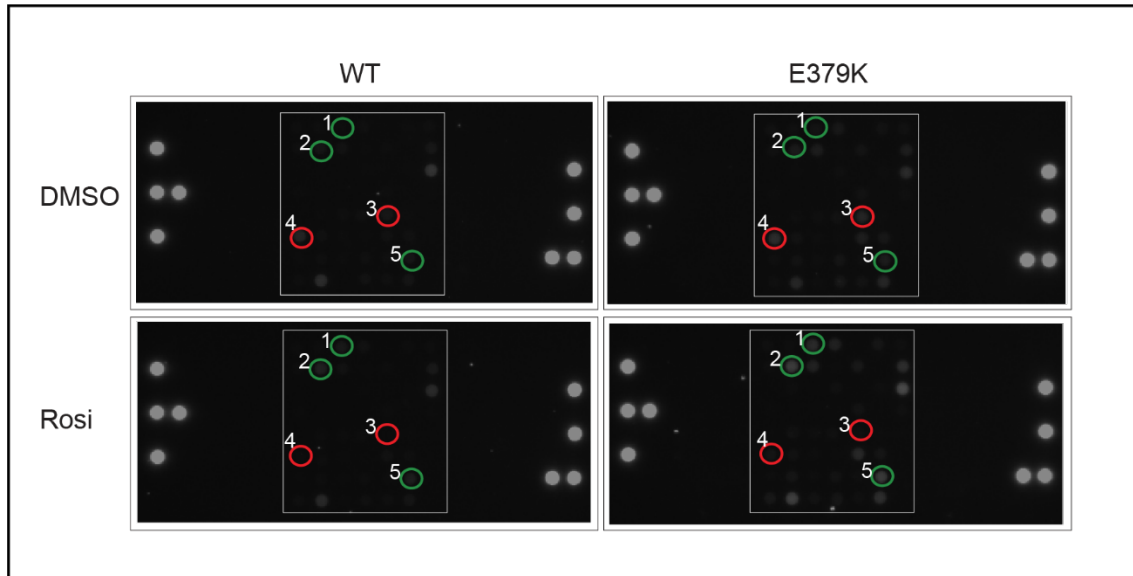

- |          |            |
|----------|------------|
| 1. CBP   | LxxLL 70   |
| 2. EP300 | LxxLL 81   |
| 3. NCoR1 | LxxII 2263 |
| 4. NCoR2 | LxxII 2342 |
| 5. PPRB  | LxxLL 645  |

**Supplementary Fig. 12. Original images corresponding to Supplementary Fig. 5d.** Images were captured after 100 pump cycles with the same exposure time. Spots containing covalently immobilised fluorescein molecules are located on the left and right of the peptide array are used as anchor points for automated image analysis and quantification of NR binding to the coregulator motifs by BioNavigator software (PamGene, The Netherlands). Also indicated are the areas represented in Supplementary Fig. 5d.
