# Supplementary material for: PPARγ lipodystrophy mutants reveal intermolecular interactions required for enhancer activation
Source: PubMed Central journal article supplement (PMC9675755; doi:10.1038/s41467-022-34766-9), 2022-11-19
Supplement: 41467_2022_34766_MOESM3_ESM.pdf [file 41467_2022_34766_MOESM3_ESM.pdf]

## Reporting Summary

Nature Portfolio wishes to improve the reproducibility of the work that we publish. This form provides structure for consistency and transparency in reporting. For further information on Nature Portfolio policies, see our [Editorial Policies](#) and the [Editorial Policy Checklist](#).

### Statistics

For all statistical analyses, confirm that the following items are present in the figure legend, table legend, main text, or Methods section.

n/a Confirmed

- The exact sample size ( $n$ ) for each experimental group/condition, given as a discrete number and unit of measurement
- A statement on whether measurements were taken from distinct samples or whether the same sample was measured repeatedly
- The statistical test(s) used AND whether they are one- or two-sided  
*Only common tests should be described solely by name; describe more complex techniques in the Methods section.*
- A description of all covariates tested
- A description of any assumptions or corrections, such as tests of normality and adjustment for multiple comparisons
- A full description of the statistical parameters including central tendency (e.g. means) or other basic estimates (e.g. regression coefficient) AND variation (e.g. standard deviation) or associated estimates of uncertainty (e.g. confidence intervals)
- For null hypothesis testing, the test statistic (e.g.  $F$ ,  $t$ ,  $r$ ) with confidence intervals, effect sizes, degrees of freedom and  $P$  value noted  
*Give  $P$  values as exact values whenever suitable.*
- For Bayesian analysis, information on the choice of priors and Markov chain Monte Carlo settings
- For hierarchical and complex designs, identification of the appropriate level for tests and full reporting of outcomes
- Estimates of effect sizes (e.g. Cohen's  $d$ , Pearson's  $r$ ), indicating how they were calculated

*Our web collection on [statistics for biologists](#) contains articles on many of the points above.*

### Software and code

Policy information about [availability of computer code](#)

|                 |                                                                                                                                                                                                                                                                                                                                                                                                                                                                                                                                                                                                                                                                                                                                                                                                |
|-----------------|------------------------------------------------------------------------------------------------------------------------------------------------------------------------------------------------------------------------------------------------------------------------------------------------------------------------------------------------------------------------------------------------------------------------------------------------------------------------------------------------------------------------------------------------------------------------------------------------------------------------------------------------------------------------------------------------------------------------------------------------------------------------------------------------|
| Data collection | The sequencing was carried out on Illumina NovaSeq6000 using Novaseq Control Software v1.3.0, v1.4.0 and v1.6.0. Mass spectrometry data were collected on an Orbitrap Exploris from Thermo.                                                                                                                                                                                                                                                                                                                                                                                                                                                                                                                                                                                                    |
| Data analysis   | Preprocessing of sequencing was performed using FastQC (v. >0.11.8), STAR (v. >2.6.1a_08-27), HOMER (v. >4.10.3) and Picard (v. >2.5.0). Data analysis was performed in R (v. >3.5) using DESeq2 (v. >1.32.0). Codes and scripts used to process and analyze data have been deposited to GitHub: <a href="https://github.com/mstahlmadsen/PPARGgamma-lipodystrophy-mutants-reveal-intermolecular-interactions-required-for-enhancer-activation">https://github.com/mstahlmadsen/PPARGgamma-lipodystrophy-mutants-reveal-intermolecular-interactions-required-for-enhancer-activation</a> . Mass spectrometry data were analyzed using MaxQuant version 1.6.0.1 and searched against an UniProt created human database. Downstream data analysis was performed using an in-house Python script. |

For manuscripts utilizing custom algorithms or software that are central to the research but not yet described in published literature, software must be made available to editors and reviewers. We strongly encourage code deposition in a community repository (e.g. GitHub). See the Nature Portfolio [guidelines for submitting code & software](#) for further information.

### Data

Policy information about [availability of data](#)

All manuscripts must include a [data availability statement](#). This statement should provide the following information, where applicable:

- Accession codes, unique identifiers, or web links for publicly available datasets
- A description of any restrictions on data availability
- For clinical datasets or third party data, please ensure that the statement adheres to our [policy](#)

The sequence datasets generated during the current study are available in the Gene Expression Omnibus (GEO) repository, under GEO accession GSE199426

[<https://www.ncbi.nlm.nih.gov/geo/query/acc.cgi?acc=GSE199426>].

The mass spectrometry proteomics data have been deposited to the ProteomeXchange Consortium via the PRIDE partner repository with the dataset identifier PXD036589 [<http://proteomecentral.proteomexchange.org/cgi/GetDataset?ID=PX036589>].

The crystal structures used to generated Fig. 1d and Fig. 3a are available in the NCBI Protein Data Bank (PDB) as entry 3DZY.

## Field-specific reporting

Please select the one below that is the best fit for your research. If you are not sure, read the appropriate sections before making your selection.

Life sciences  Behavioural & social sciences  Ecological, evolutionary & environmental sciences

For a reference copy of the document with all sections, see [nature.com/documents/nr-reporting-summary-flat.pdf](https://nature.com/documents/nr-reporting-summary-flat.pdf)

## Life sciences study design

All studies must disclose on these points even when the disclosure is negative.

|                 |                                                                                                                                                                                                                                                                                                                                                                                                                                                    |
|-----------------|----------------------------------------------------------------------------------------------------------------------------------------------------------------------------------------------------------------------------------------------------------------------------------------------------------------------------------------------------------------------------------------------------------------------------------------------------|
| Sample size     | No statistical methods were used to calculate necessary sample size. Reporter assays were performed at least 3 times independently with technical replicates, based on previous studies (e.g. PMID: 30595551). Western blots were performed 3 times independently. Sequencing depth is the only sampling process in the associated sequencing data. Sequencing depth were guided based on standards in the field (e.g. the ENCODE Data standards). |
| Data exclusions | No data were excluded from the analysis.                                                                                                                                                                                                                                                                                                                                                                                                           |
| Replication     | Reporter assays were repeated independently 3-5 times and Western blot analyses 3 times. Differential gene expression, differential transcription factor or co-factor occupancy, and differential H3K27-acetylation all rely on independent biological replication (n = 2). All attempts at replication were successful and hence no unsuccessful replicates were excluded from the datasets.                                                      |
| Randomization   | For any individual experiments, cells were expanded until a sufficient number was attained. Subsequently, the cells were pooled to a single homogeneous cell suspension and distributed on culture dishes for treatment. Culture dishes were assigned randomly to treatments.                                                                                                                                                                      |
| Blinding        | Data acquisition was not performed blindly due to the specific phenotypes and/or characteristics of the cell lines generated. In addition, all samples within a specific experiment underwent the same experimental treatment and metrics were derived from absolute quantitative methods without human subjectivity.                                                                                                                              |

## Reporting for specific materials, systems and methods

We require information from authors about some types of materials, experimental systems and methods used in many studies. Here, indicate whether each material, system or method listed is relevant to your study. If you are not sure if a list item applies to your research, read the appropriate section before selecting a response.

### Materials & experimental systems

### Methods

| n/a                                 | Involved in the study                                           |
|-------------------------------------|-----------------------------------------------------------------|
| <input type="checkbox"/>            | <input checked="" type="checkbox"/> Antibodies                  |
| <input type="checkbox"/>            | <input checked="" type="checkbox"/> Eukaryotic cell lines       |
| <input checked="" type="checkbox"/> | <input type="checkbox"/> Palaeontology and archaeology          |
| <input checked="" type="checkbox"/> | <input type="checkbox"/> Animals and other organisms            |
| <input type="checkbox"/>            | <input checked="" type="checkbox"/> Human research participants |
| <input checked="" type="checkbox"/> | <input type="checkbox"/> Clinical data                          |
| <input checked="" type="checkbox"/> | <input type="checkbox"/> Dual use research of concern           |

| n/a                                 | Involved in the study                           |
|-------------------------------------|-------------------------------------------------|
| <input type="checkbox"/>            | <input checked="" type="checkbox"/> ChIP-seq    |
| <input checked="" type="checkbox"/> | <input type="checkbox"/> Flow cytometry         |
| <input checked="" type="checkbox"/> | <input type="checkbox"/> MRI-based neuroimaging |

## Antibodies

|                 |                                                                                                                                                                                                                                                                                                                                                                                                                                                                                                                                                                                                                                                                                                                                                                                                                                                                                             |
|-----------------|---------------------------------------------------------------------------------------------------------------------------------------------------------------------------------------------------------------------------------------------------------------------------------------------------------------------------------------------------------------------------------------------------------------------------------------------------------------------------------------------------------------------------------------------------------------------------------------------------------------------------------------------------------------------------------------------------------------------------------------------------------------------------------------------------------------------------------------------------------------------------------------------|
| Antibodies used | For Western blotting: anti-PPAR $\gamma$ (sc-7196; RRID: AB_654710), anti-Gal4 DBD (sc-510; RRID: AB_627655), anti-FABP4 (sc-18661; RRID: AB_2231568), anti-RXR $\alpha$ (sc-553; RRID: AB_2184874), anti-tubulin (Sigma Aldrich T9026; RRID: AB_477593), anti-FLAG-HRP (Sigma Aldrich A8592; RRID: AB_439702), anti-HA (ab9110; RRID: AB_307019) and anti-LgBiT (Promega N7100). Also a non-commercial antibody was used to detect LPL, described previously {PMID 16517593}.<br>For ChIPseq assays: anti-hemagglutinin (HA, Abcam Ab9110; RRID: AB_307019), anti-H3K27ac (Abcam, Ab4729, RRID: AB_2118291), and anti-MED1 (Bethyl Laboratories, A300-793A; RRID: AB_577241).                                                                                                                                                                                                              |
| Validation      | anti-PPAR $\gamma$ (sc-7196; RRID: AB_654710): reacts against human; <a href="https://datasheets.scbt.com/sc-7196.pdf">https://datasheets.scbt.com/sc-7196.pdf</a><br>anti-Gal4 DBD (sc-510; RRID: AB_627655): reacts against yeast Gal4DBD in fusion proteins; <a href="https://datasheets.scbt.com/sc-510.pdf">https://datasheets.scbt.com/sc-510.pdf</a><br>anti-FABP4 (sc-18661; RRID: AB_2231568): reacts against mouse; <a href="https://datasheets.scbt.com/sc-18661.pdf">https://datasheets.scbt.com/sc-18661.pdf</a><br>anti-RXR $\alpha$ (sc-553; RRID: AB_2184874): reacts against human; <a href="https://datasheets.scbt.com/sc-553.pdf">https://datasheets.scbt.com/sc-553.pdf</a><br>anti-tubulin (Sigma Aldrich T9026; RRID: AB_477593): reacts against human, mouse; <a href="https://www.sigmaaldrich.com/NL/en/product/">https://www.sigmaaldrich.com/NL/en/product/</a> |

sigma/t9026  
 anti-FLAG-HRP (Sigma Aldrich A8592; RRID: AB\_439702); reacts against epitope tag; <https://www.sigmaaldrich.com/NL/en/product/sigma/a8592>  
 anti-HA (ab9110; RRID:AB\_307019): reacts against epitope tag; <https://www.abcam.com/ha-tag-antibody-chip-grade-ab9110.html>  
 anti-LgBiT (Promega, N7100): reacts against Large BiT (LgBiT) Subunit and LgBiT Fusion Proteins; [https://nld.promega.com/-/media/files/resources/protocols/product-information-sheets/n/anti-lgbit-monoclonal-antibody-protocol-9pin7100.pdf?rev=ba3540a6d76b4a178733e56b99af5adc&sc\\_lang=en](https://nld.promega.com/-/media/files/resources/protocols/product-information-sheets/n/anti-lgbit-monoclonal-antibody-protocol-9pin7100.pdf?rev=ba3540a6d76b4a178733e56b99af5adc&sc_lang=en)  
 anti-LPL (non-commercial): reacts against mouse; described previously [PMID 16517593]  
  
 anti-hemagglutinin (HA, Abcam Ab9110; RRID: AB\_307019):reacts against epitope tag, ChIP grade; <https://www.abcam.com/ha-tag-antibody-chip-grade-ab9110.html>  
 anti-H3K27ac (Abcam, Ab4729, RRID: AB\_2118291): reacts against mouse, ChIP grade; <https://www.abcam.com/histone-h3-acetyl-k27-antibody-chip-grade-ab4729.html>  
 anti-MED1 (Bethyl Laboratories, A300-793A; RRID: AB\_577241): reacts against mouse; [https://www.thermofisher.com/antibody/product/A300-793A.html?gclid=EAlalQobChMI-OajgofL9gIVgvdRCh11nwnJEAAYASAAEgl6z\\_D\\_BwE&ef\\_id=EAlalQobChMI-OajgofL9gIVgvdRCh11nwnJEAAYASAAEgl6z\\_D\\_BwE:G:s&s\\_kwcid=AL13652131459737518508!!g!!&cid=bid\\_pca\\_aup\\_r01\\_co\\_cp1359\\_pjt0000\\_bid00000\\_0se\\_gaw\\_dy\\_pur\\_con](https://www.thermofisher.com/antibody/product/A300-793A.html?gclid=EAlalQobChMI-OajgofL9gIVgvdRCh11nwnJEAAYASAAEgl6z_D_BwE&ef_id=EAlalQobChMI-OajgofL9gIVgvdRCh11nwnJEAAYASAAEgl6z_D_BwE:G:s&s_kwcid=AL13652131459737518508!!g!!&cid=bid_pca_aup_r01_co_cp1359_pjt0000_bid00000_0se_gaw_dy_pur_con)

## Eukaryotic cell lines

### Policy information about cell lines

|                                                   |                                                                                                                                                                                                                   |
|---------------------------------------------------|-------------------------------------------------------------------------------------------------------------------------------------------------------------------------------------------------------------------|
| Cell line source(s)                               | U2OS, HEK293 and HEK293T cells were obtained from ATCC; PPAR $\gamma$ -/- MEF-CAR cell line were generated and described previously [PMID 24379442] based on the PPAR $\gamma$ -/- MEF cell line [PMID 11782441]. |
| Authentication                                    | None of the cell lines used were authenticated                                                                                                                                                                    |
| Mycoplasma contamination                          | All cell lines used tested negative for mycoplasma contamination                                                                                                                                                  |
| Commonly misidentified lines (See ICLAC register) | No commonly misidentified cell lines were used                                                                                                                                                                    |

## Human research participants

### Policy information about studies involving human research participants

|                            |                                                                                                                                                                                                                                                                                                                                                                                                                                                                                                                                                                                                                                                                                                                                                                                                                                                                                                                                                                    |
|----------------------------|--------------------------------------------------------------------------------------------------------------------------------------------------------------------------------------------------------------------------------------------------------------------------------------------------------------------------------------------------------------------------------------------------------------------------------------------------------------------------------------------------------------------------------------------------------------------------------------------------------------------------------------------------------------------------------------------------------------------------------------------------------------------------------------------------------------------------------------------------------------------------------------------------------------------------------------------------------------------|
| Population characteristics | Index patients from two unrelated families presented with metabolic complications related to insulin resistance and/or type 2 diabetes in the departments of internal medicine from UMC Utrecht (Netherlands) and KU Leuven (Belgium). Patients showed partial lipodystrophy and upon identification of a heterozygous PPAR $\gamma$ mutation via Sanger sequencing in diagnostic workup the clinical phenotype was defined as Familial Partial Lipodystrophy Disease type 3 (FPLD3; OMIM 604367). In agreement with all other FPLD3 cases reported so far worldwide (PMID: 30742913; 33716977), the index patients were adult females, with several clinical features frequently observed in FPLD3 patients in addition to their partial lipodystrophy indicated in Fig. 1a and 1b. Subsequently, co-segregation in family members was analyzed by targeted sequencing. Diagnosis and investigations were made in accordance with local institutional guidelines. |
| Recruitment                | Index patients were recruited amongst patients that had been referred to the departments of internal medicine from UMC Utrecht (Netherlands) or KU Leuven (Belgium) with metabolic complications related to insulin resistance and/or type 2 diabetes. The index patients and their participating family members underwent careful clinical assessment for FPLD characteristics (partial lipodystrophy) by the clinical teams to assess co-segregation of FPLD3 and the identified PPAR $\gamma$ variant. No biases were present in the recruitment process as this was based on clinical and genetic data. Consent for participation, phenotyping and publication was obtained of all participating subjects through the referring clinical teams.                                                                                                                                                                                                                |
| Ethics oversight           | All procedures performed in studies involving human participants were in accordance with the ethical standards of the institutional and/or national research committee and with the 1964 Helsinki declaration and its later amendments or comparable ethical standards. Studies were performed under ethical approval of Ethics Committee of University Hospitals Leuven (File S57866) and the Ethics Committee NedMec (File 22-891). The index patients and family members gave written informed consent for genetic and clinical investigation and publication and procedures were in accordance with institutional guidelines.                                                                                                                                                                                                                                                                                                                                  |

Note that full information on the approval of the study protocol must also be provided in the manuscript.

## ChIP-seq

### Data deposition

- Confirm that both raw and final processed data have been deposited in a public database such as [GEO](#).
- Confirm that you have deposited or provided access to graph files (e.g. BED files) for the called peaks.

### Data access links

May remain private before publication.

<https://eur03.safelinks.protection.outlook.com/?url=https%3A%2F%2Fwww.ncbi.nlm.nih.gov%2Fgeo%2Fquery%2Facc.cgi%3Facc%3D%2F199426&data=04%7C01%7Cmsm%40bmb.sdu.dk%7C26ca4afa7a404cc18e1408da10ea4c06%7C9a97c27db83e4694b35354bdf18ab5b%7C0%7C0%7C637840895779969841%7CUnknown%7CTWfpbGZsb3d8eyJWjoiMC4wLjAwMDAiLCJQIjoiV2luMzIiLCJBTiI6IjEhaWwiLCJXVCi6Mn0%3D>

Files in database submission

SM3041\_S1\_L001\_R1\_001.fastq.gz  
SM3042\_S2\_L001\_R1\_001.fastq.gz  
SM3043\_S3\_L001\_R1\_001.fastq.gz  
SM3044\_S4\_L001\_R1\_001.fastq.gz  
SM3045\_S5\_L001\_R1\_001.fastq.gz  
SM3046\_S6\_L001\_R1\_001.fastq.gz  
SM3047\_S7\_L001\_R1\_001.fastq.gz  
SM3048\_S8\_L001\_R1\_001.fastq.gz  
SM3166\_R2\_all.fastq.gz  
SM3167\_R2\_all.fastq.gz  
SM3168\_R2\_all.fastq.gz  
SM3169\_R2\_all.fastq.gz  
SM3170\_R2\_all.fastq.gz  
SM3171\_R2\_all.fastq.gz  
SM3172\_R2\_all.fastq.gz  
SM3173\_R2\_all.fastq.gz  
SM3638\_S12\_L001\_R1\_001.fastq.gz  
SM3638\_S12\_L001\_R2\_001.fastq.gz  
SM3639\_S13\_L001\_R1\_001.fastq.gz  
SM3639\_S13\_L001\_R2\_001.fastq.gz  
SM3640\_S14\_L001\_R1\_001.fastq.gz  
SM3640\_S14\_L001\_R2\_001.fastq.gz  
SM3641\_S15\_L001\_R1\_001.fastq.gz  
SM3641\_S15\_L001\_R2\_001.fastq.gz  
SM3642\_S16\_L001\_R1\_001.fastq.gz  
SM3642\_S16\_L001\_R2\_001.fastq.gz  
SM3643\_S17\_L001\_R1\_001.fastq.gz  
SM3643\_S17\_L001\_R2\_001.fastq.gz  
SM3644\_S18\_L001\_R1\_001.fastq.gz  
SM3644\_S18\_L001\_R2\_001.fastq.gz  
SM3645\_S19\_L001\_R1\_001.fastq.gz  
SM3645\_S19\_L001\_R2\_001.fastq.gz  
SM3903\_S20\_L001\_R1\_001.fastq.gz  
SM3903\_S20\_L001\_R2\_001.fastq.gz  
SM3904\_S21\_L001\_R1\_001.fastq.gz  
SM3904\_S21\_L001\_R2\_001.fastq.gz  
6391\_S1\_R1\_001.fastq.gz  
6391\_S1\_R2\_001.fastq.gz  
6392\_S2\_R1\_001.fastq.gz  
6392\_S2\_R2\_001.fastq.gz  
6393\_S3\_R1\_001.fastq.gz  
6393\_S3\_R2\_001.fastq.gz  
6394\_S4\_R1\_001.fastq.gz  
6394\_S4\_R2\_001.fastq.gz  
6395\_S5\_R1\_001.fastq.gz  
6395\_S5\_R2\_001.fastq.gz  
6396\_S6\_R1\_001.fastq.gz  
6396\_S6\_R2\_001.fastq.gz  
6397\_S7\_R1\_001.fastq.gz  
6397\_S7\_R2\_001.fastq.gz  
6398\_S8\_R1\_001.fastq.gz  
6398\_S8\_R2\_001.fastq.gz  
ControlRep1\_R1.fastq.gz  
ControlRep1\_R2.fastq.gz  
ControlRep2\_R1.fastq.gz  
ControlRep2\_R2.fastq.gz  
E379KRep1\_R1.fastq.gz  
E379KRep1\_R2.fastq.gz  
E379KRep2\_R1.fastq.gz  
E379KRep2\_R2.fastq.gz  
R212QRep1\_R1.fastq.gz  
R212QRep1\_R2.fastq.gz  
R212QRep2\_R1.fastq.gz  
R212QRep2\_R2.fastq.gz  
WTRep1\_R1.fastq.gz  
WTRep1\_R2.fastq.gz  
WTRep2\_R1.fastq.gz  
WTRep2\_R2.fastq.gz  
SM3041.star\_Aligned.out.primary.bigwig  
SM3042.star\_Aligned.out.primary.bigwig  
SM3043.star\_Aligned.out.primary.bigwig  
SM3044.star\_Aligned.out.primary.bigwig  
SM3045.star\_Aligned.out.primary.bigwig

SM3046.star\_Aligned.out.primary.bigwig  
 SM3047.star\_Aligned.out.primary.bigwig  
 SM3048.star\_Aligned.out.primary\_Frag120.bigwig  
 SM3166\_R2\_all\_star.Aligned.out.primary.dedup.bigwig  
 SM3167\_R2\_all\_star.Aligned.out.primary.dedup.bigwig  
 SM3168\_R2\_all\_star.Aligned.out.primary.dedup.bigwig  
 SM3169\_R2\_all\_star.Aligned.out.primary.dedup.bigwig  
 SM3170\_R2\_all\_star.Aligned.out.primary.dedup.bigwig  
 SM3171\_R2\_all\_star.Aligned.out.primary.dedup.bigwig  
 SM3172\_R2\_all\_star.Aligned.out.primary.dedup.bigwig  
 SM3173\_R2\_all\_star.Aligned.out.primary.dedup.bigwig  
 SM3638\_star.Aligned.out.primary.dedup.bigwig  
 SM3639\_star.Aligned.out.primary.dedup.bigwig  
 SM3640\_downsampled.bigwig  
 SM3641\_star.Aligned.out.primary.dedup.bigwig  
 SM3642\_star.Aligned.out.primary.dedup.bigwig  
 SM3643\_star.Aligned.out.primary.dedup.bigwig  
 SM3644\_star.Aligned.out.primary.dedup.bigwig  
 SM3645\_star.Aligned.out.primary.dedup.bigwig  
 SM3903\_star.Aligned.out.primary.dedup.bigwig  
 SM3904\_star.Aligned.out.primary.dedup.bigwig  
 6391\_star.Aligned.out.primary.dedup.bigwig  
 6392\_star.Aligned.out.primary.dedup.bigwig  
 6393\_star.Aligned.out.primary.dedup.bigwig  
 6394\_star.Aligned.out.primary.dedup.bigwig  
 6395\_star.Aligned.out.primary.dedup.bigwig  
 6396\_star.Aligned.out.primary.dedup.bigwig  
 6397\_star.Aligned.out.primary.dedup.bigwig  
 6398\_star.Aligned.out.primary.dedup.bigwig  
 ControlRep1\_star.Aligned.out.primary.dedup\_under120.bigwig  
 ControlRep2\_star.Aligned.out.primary.dedup\_under120.bigwig  
 E379KRep1\_star.Aligned.out.primary.dedup\_under120.bigwig  
 E379KRep2\_star.Aligned.out.primary.dedup\_under120.bigwig  
 R212QRep1\_star.Aligned.out.primary.dedup\_under120.bigwig  
 R212QRep2\_star.Aligned.out.primary.dedup\_under120.bigwig  
 WTRep1\_star.Aligned.out.primary.dedup\_under120.bigwig  
 WTRep2\_star.Aligned.out.primary.dedup\_under120.bigwig  
 HApairs\_DESeq2.bed  
 Counts\_RNA\_FPLD3\_mm10.txt

Genome browser session  
 (e.g. [UCSC](https://genome.ucsc.edu/s/MariaStahl/NatCom_FPLD3))

[https://genome.ucsc.edu/s/MariaStahl/NatCom\\_FPLD3](https://genome.ucsc.edu/s/MariaStahl/NatCom_FPLD3)

## Methodology

Replicates

All RNA-, ChIP-, and ATAC-seq experiments have been replicated in two independent experiments in PPARg/- MEF-CAR cells.

Sequencing depth

Sample; # Reads; # Mapping reads; Length of reads; Type  
 SM3041\_S1\_L001\_R1\_001.fastq.gz 34268994 30994699 151 SE  
 SM3042\_S2\_L001\_R1\_001.fastq.gz 30310633 26831873 151 SE  
 SM3043\_S3\_L001\_R1\_001.fastq.gz 23454360 20699690 151 SE  
 SM3044\_S4\_L001\_R1\_001.fastq.gz 24996883 21956930 151 SE  
 SM3045\_S5\_L001\_R1\_001.fastq.gz 19613908 17360797 151 SE  
 SM3046\_S6\_L001\_R1\_001.fastq.gz 22592975 20421397 151 SE  
 SM3047\_S7\_L001\_R1\_001.fastq.gz 31635010 28376820 151 SE  
 SM3048\_S8\_L001\_R1\_001.fastq.gz 29006121 26191794 151 SE  
 SM3166\_R2\_all.fastq.gz 19780419 17501621 151 SE  
 SM3167\_R2\_all.fastq.gz 61946443 53289358 151 SE  
 SM3168\_R2\_all.fastq.gz 22014283 19216272 151 SE  
 SM3169\_R2\_all.fastq.gz 12564754 11275250 151 SE  
 SM3170\_R2\_all.fastq.gz 13373042 11979211 151 SE  
 SM3171\_R2\_all.fastq.gz 26583076 18914403 151 SE  
 SM3172\_R2\_all.fastq.gz 12404556 11293957 151 SE  
 SM3173\_R2\_all.fastq.gz 12966156 11797174 151 SE  
 SM3638\_S12\_L001\_R1\_001.fastq.gz 39526347 36958918 50 PE  
 SM3638\_S12\_L001\_R2\_001.fastq.gz 39526347 36958918 50 PE  
 SM3639\_S13\_L001\_R1\_001.fastq.gz 18705171 17528355 50 PE  
 SM3639\_S13\_L001\_R2\_001.fastq.gz 18705171 17528355 50 PE  
 SM3640\_S14\_L001\_R1\_001.fastq.gz 218764680 204523157 50 PE  
 SM3640\_S14\_L001\_R2\_001.fastq.gz 218764680 204523157 50 PE  
 SM3641\_S15\_L001\_R1\_001.fastq.gz 31974741 29839772 50 PE  
 SM3641\_S15\_L001\_R2\_001.fastq.gz 31974741 29839772 50 PE  
 SM3642\_S16\_L001\_R1\_001.fastq.gz 21810433 20562350 50 PE  
 SM3642\_S16\_L001\_R2\_001.fastq.gz 21810433 20562350 50 PE  
 SM3643\_S17\_L001\_R1\_001.fastq.gz 21567910 20228485 50 PE  
 SM3643\_S17\_L001\_R2\_001.fastq.gz 21567910 20228485 50 PE

SM3644\_S18\_L001\_R1\_001.fastq.gz 37138202 34911471 50 PE  
 SM3644\_S18\_L001\_R2\_001.fastq.gz 37138202 34911471 50 PE  
 SM3645\_S19\_L001\_R1\_001.fastq.gz 20596582 19376902 50 PE  
 SM3645\_S19\_L001\_R2\_001.fastq.gz 20596582 19376902 50 PE  
 SM3903\_S20\_L001\_R1\_001.fastq.gz 23270889 20884370 50 PE  
 SM3903\_S20\_L001\_R2\_001.fastq.gz 23270889 20884370 50 PE  
 SM3904\_S21\_L001\_R1\_001.fastq.gz 30777876 27941860 50 PE  
 SM3904\_S21\_L001\_R2\_001.fastq.gz 30777876 27941860 50 PE  
 6391\_S1\_R1\_001.fastq.gz 22208685 19842326 50 PE  
 6391\_S1\_R2\_001.fastq.gz 22208685 19842326 50 PE  
 6392\_S2\_R1\_001.fastq.gz 17947220 15544904 50 PE  
 6392\_S2\_R2\_001.fastq.gz 17947220 15544904 50 PE  
 6393\_S3\_R1\_001.fastq.gz 19907184 17779815 50 PE  
 6393\_S3\_R2\_001.fastq.gz 19907184 17779815 50 PE  
 6394\_S4\_R1\_001.fastq.gz 19921443 17162330 50 PE  
 6394\_S4\_R2\_001.fastq.gz 19921443 17162330 50 PE  
 6395\_S5\_R1\_001.fastq.gz 20779331 18552888 50 PE  
 6395\_S5\_R2\_001.fastq.gz 20779331 18552888 50 PE  
 6396\_S6\_R1\_001.fastq.gz 24082949 21293065 50 PE  
 6396\_S6\_R2\_001.fastq.gz 24082949 21293065 50 PE  
 6397\_S7\_R1\_001.fastq.gz 20810975 18395385 50 PE  
 6397\_S7\_R2\_001.fastq.gz 20810975 18395385 50 PE  
 6398\_S8\_R1\_001.fastq.gz 19409815 17232265 50 PE  
 6398\_S8\_R2\_001.fastq.gz 19409815 17232265 50 PE  
 ControlRep1\_R1.fastq.gz 78167905 59678271 50 PE  
 ControlRep1\_R2.fastq.gz 78167905 59678271 50 PE  
 ControlRep2\_R1.fastq.gz 53105367 40561386 50 PE  
 ControlRep2\_R2.fastq.gz 53105367 40561386 50 PE  
 E379KRep1\_R1.fastq.gz 44332063 34461132 50 PE  
 E379KRep1\_R2.fastq.gz 44332063 34461132 50 PE  
 E379KRep2\_R1.fastq.gz 41867371 31034828 50 PE  
 E379KRep2\_R2.fastq.gz 41867371 31034828 50 PE  
 R212QRep1\_R1.fastq.gz 44645048 33924092 50 PE  
 R212QRep1\_R2.fastq.gz 44645048 33924092 50 PE  
 R212QRep2\_R1.fastq.gz 51767362 38668446 50 PE  
 R212QRep2\_R2.fastq.gz 51767362 38668446 50 PE  
 WTRep1\_R1.fastq.gz 40043050 30326932 50 PE  
 WTRep1\_R2.fastq.gz 40043050 30326932 50 PE  
 WTRep2\_R1.fastq.gz 50259817 37118031 50 PE  
 WTRep2\_R2.fastq.gz 50259817 37118031 50 PE

## Antibodies

As mentioned above:  
 HA: Abcam, Cat# Ab9110; lot# GR-3177614-9  
 H3K27ac: Abcam; Cat# Ab4729, lot# GR-3211959-1  
 MED1: Bethyl Laboratories, Cat# A300-793A, lot# 9

## Peak calling parameters

Mapping with STAR with parameters: outFilterMismatchNmax 2, alignIntronMax 1, outSJfilterIntronMaxVsReadN 0, and outFilterMatchNmin 25  
 Select primary alignment using Samtools:  
 samtools view -H \$SAMFILE > Header  
 awk '\$2 == 0 || \$2 == 16 { print \$0 }' \$SAMFILE | cat Header - > \${SAMFILE}/.sam/.primary.sam  
 Deduplicate samfile using Picard with optical duplication pixel distance =2500.  
 Make tag directories using HOMER makeTagDirectories with settings: -tbp 1  
 Peak calling was done on HA-ChIP from PPARg2-WT expressing cells using HA-ChIP from untransduced cells as input. Prior to peak calling, tag directories from the two replicates were pooled. Peak were called using HOMER findPeaks (version 4.10.3) with parameters; -style factor -localSize 20000.  
 Input files for peak calling are:  
 HA-ChIP PPARgWT; SM3166\_R2\_all.fastq.gz, SM3170\_R2\_all.fastq.gz  
 HA-ChIP untransduced control (serves as input); SM3169\_R2\_all.fastq.gz, SM3173\_R2\_all.fastq.gz

## Data quality

Peak quality was ensured using analysis with HOMER findPeaks. Replicate consistency were controlled using DESeq2. 41830 peaks were identified at FDR 0.1% and 4-fold enrichment over local background. For quantification of read density in peaks, only 1 read per position was allowed to ensure removal of potential PCR duplicates.

## Software

Sequencing quality was checked using FastQC (<http://www.bioinformatics.babraham.ac.uk/projects/fastqc/>). Reads were aligned using STAR (disallowing exon-exon junction mapping). BAM files were sorted and deduplicated using Picard (<https://broadinstitute.github.io/picard/>). Read density quantification and visualization in the paper was done using HOMER (<http://homer.ucsd.edu/homer/>).
